# Supplementary material
Source: publisher figshare collection journal article supplement (https://acs.figshare.com/ndownloader/files/5168914)

# Supporting Information

## RCM Approaches Toward the Diastereoselective Synthesis of Vicinal *trans*-Diaminocyclitols from *L*-Serine

Xin Cong,<sup>1,2</sup> Qing-Jiang Liao<sup>2</sup> and Zhu-Jun Yao<sup>1\*</sup>

<sup>1</sup>*State Key Laboratory of Bioorganic and Natural Products Chemistry, Shanghai  
Institute of Organic Chemistry, Chinese Academy of Sciences, 354 Fenglin Road,  
Shanghai 200032, China.* <sup>2</sup>*Department of Medicinal Chemistry, China  
Pharmaceutical University, 24 Tongji Xiang Road, Nanjing 210009, China.*

Fax: +8621 6416 6128; E-mail: [yaoz@mail.sioc.ac.cn](mailto:yaoz@mail.sioc.ac.cn)

### List of Contents

1. General Experimental Section (Page S-2)
2. The <sup>1</sup>H NMR and <sup>13</sup>C NMR copies of compounds **1-4**, **20** and NOESY  
copies of compounds **1-3**, **20** and **28** (From page S-3 to page S-17).

## General Experimental Section

All reactions were carried out under argon or nitrogen in oven-dried glassware using standard gastight syringes, cannulas, and septa. Solvents and reagents were purified and dried by standard methods prior to use. Optical rotations were measured at room temperature. IR spectra were recorded on an FT-IR instrument.  $^1\text{H}$  NMR spectra were recorded at 300 MHz and are reported in parts per million ( $\delta$ ) downfield relative to TMS as internal standard, and  $^{13}\text{C}$  NMR spectra were recorded at 75 MHz and assigned in parts per million ( $\delta$ ). Flash column chromatographies were performed on silica gel (10-40  $\mu\text{m}$ ) using mixtures of petroleum ether and ethyl acetate as the eluents.

Hz

Compound 20  $^1\text{H}$  NMR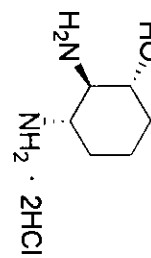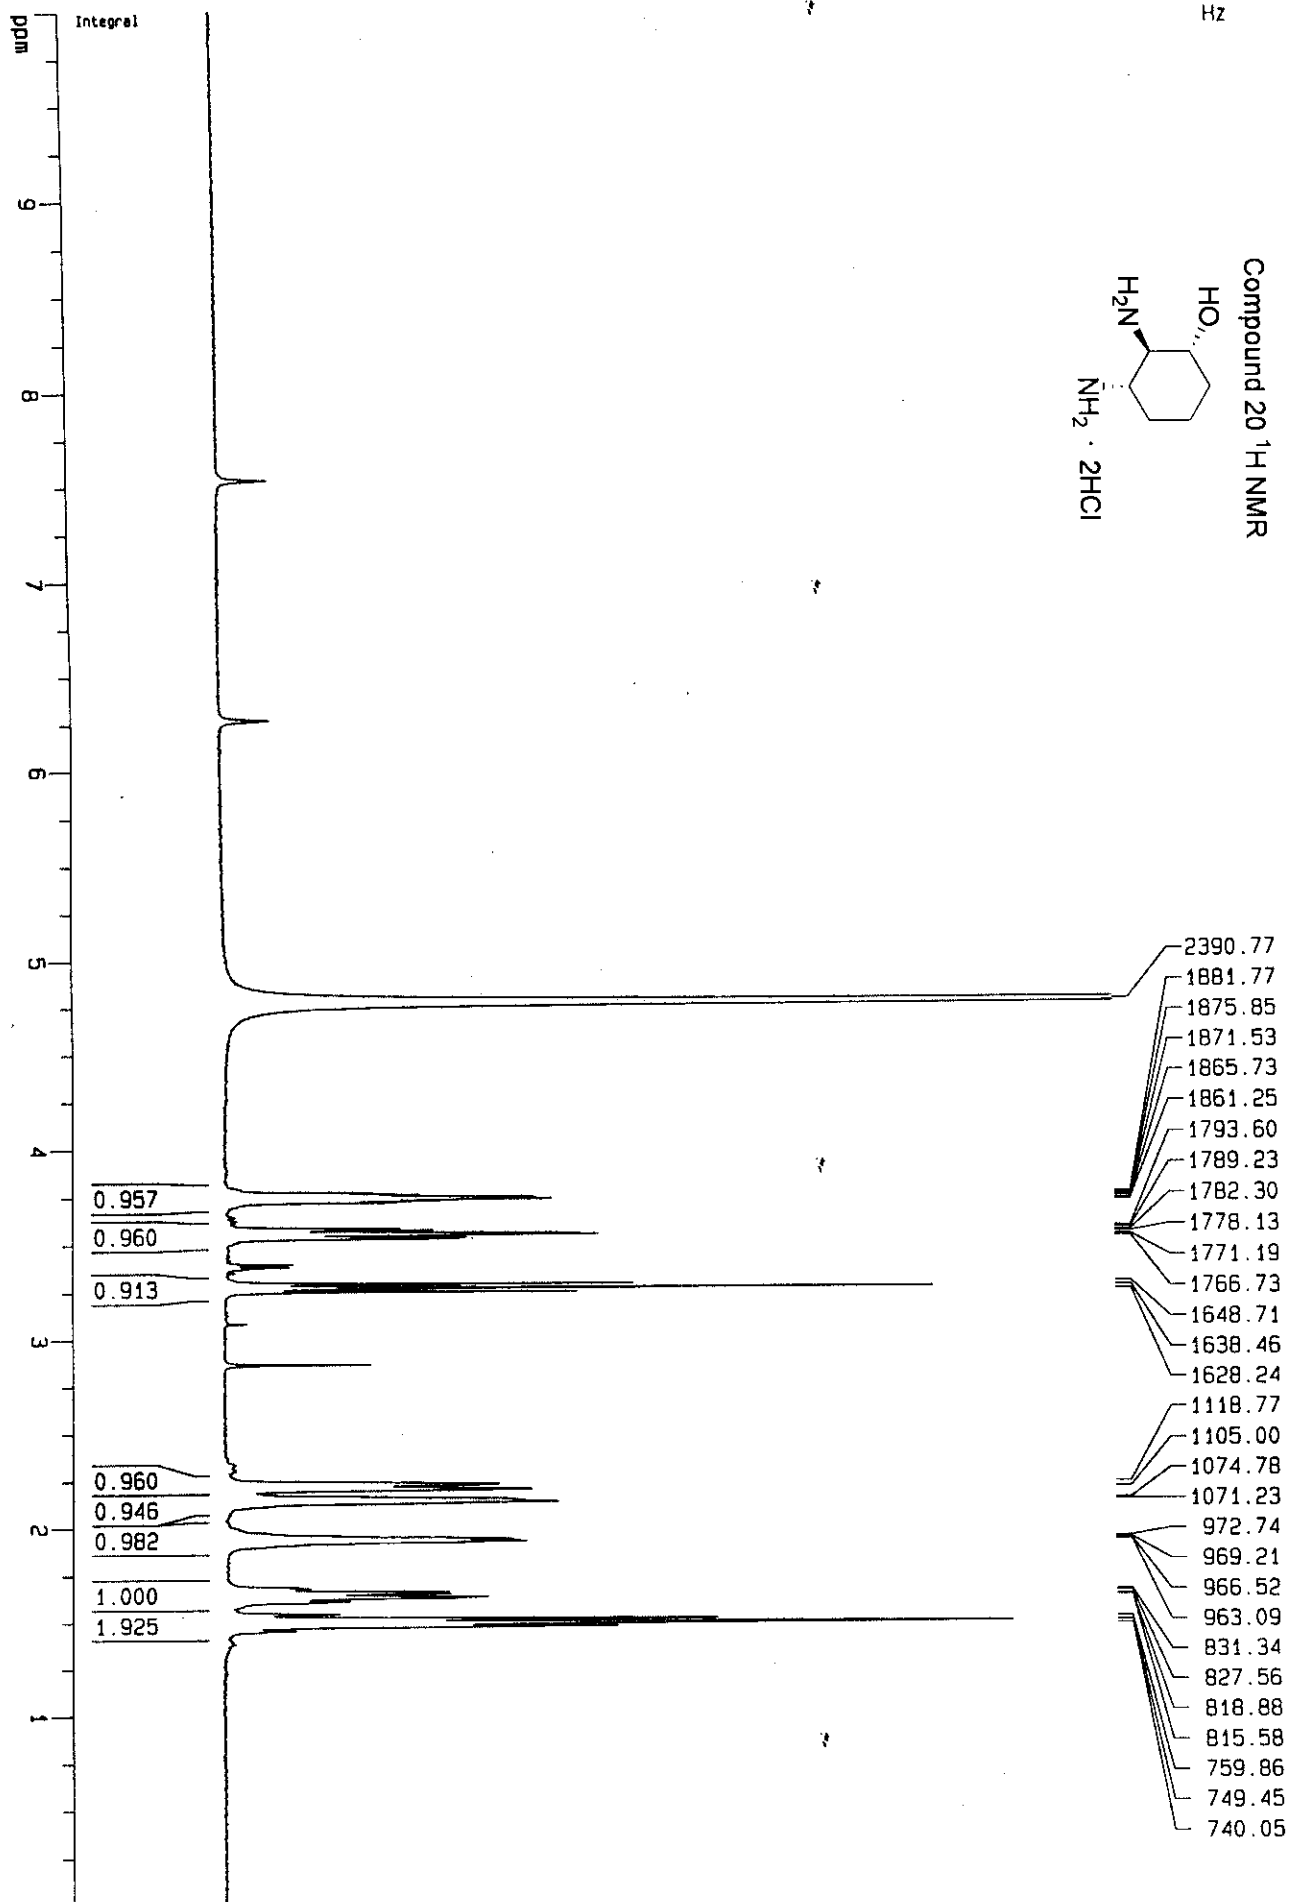

ppm

Compound 20  $^{13}\text{C}$  NMR

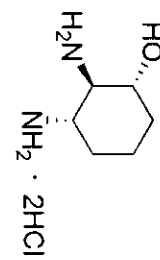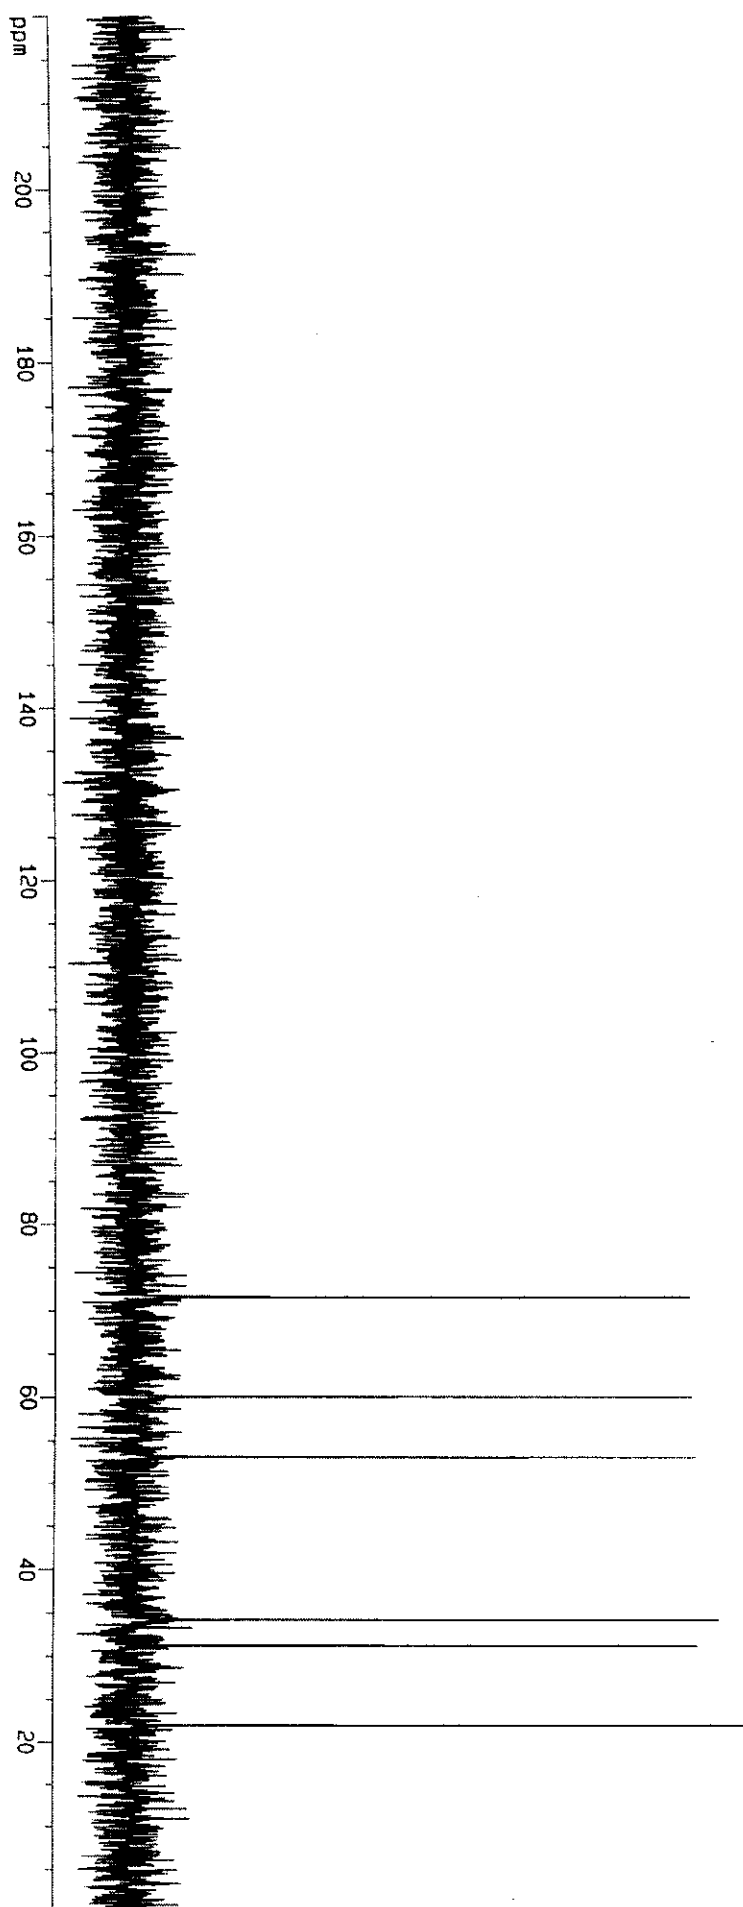

71.6049

60.1298

53.0785

34.1662

31.1915

21.9743

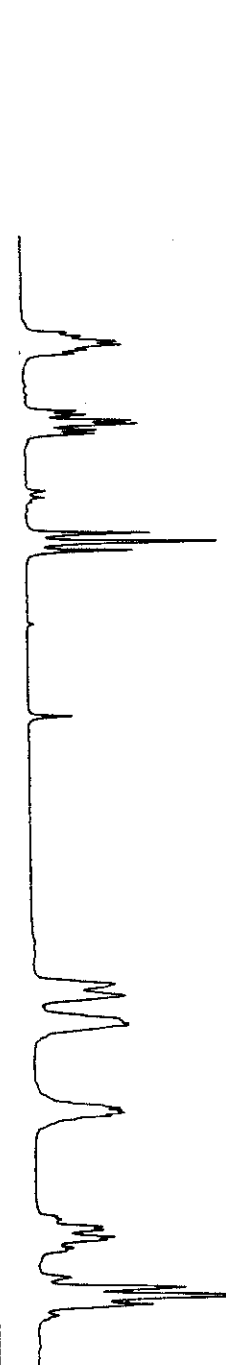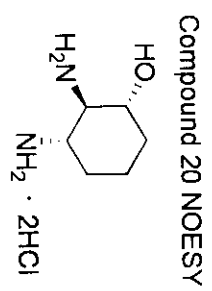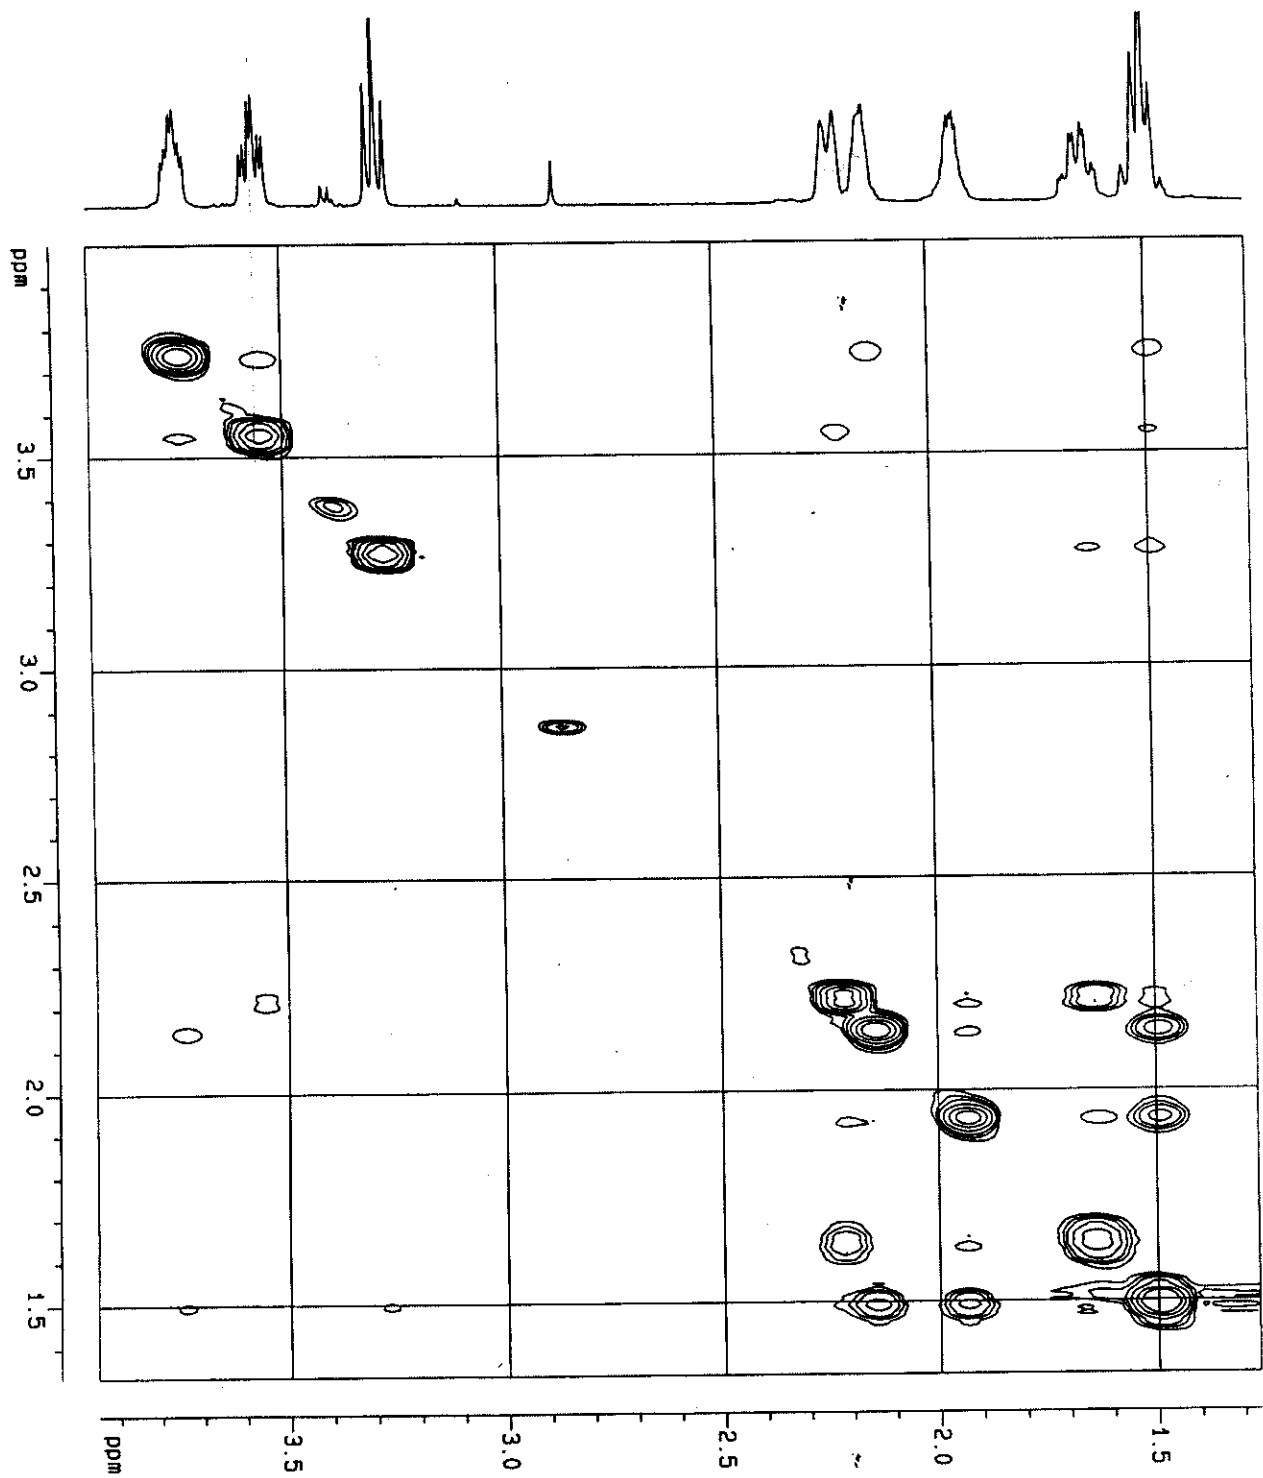

Compound 1  $^1\text{H}$  NMR

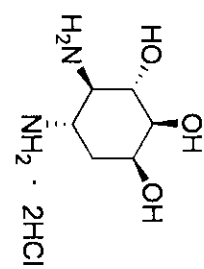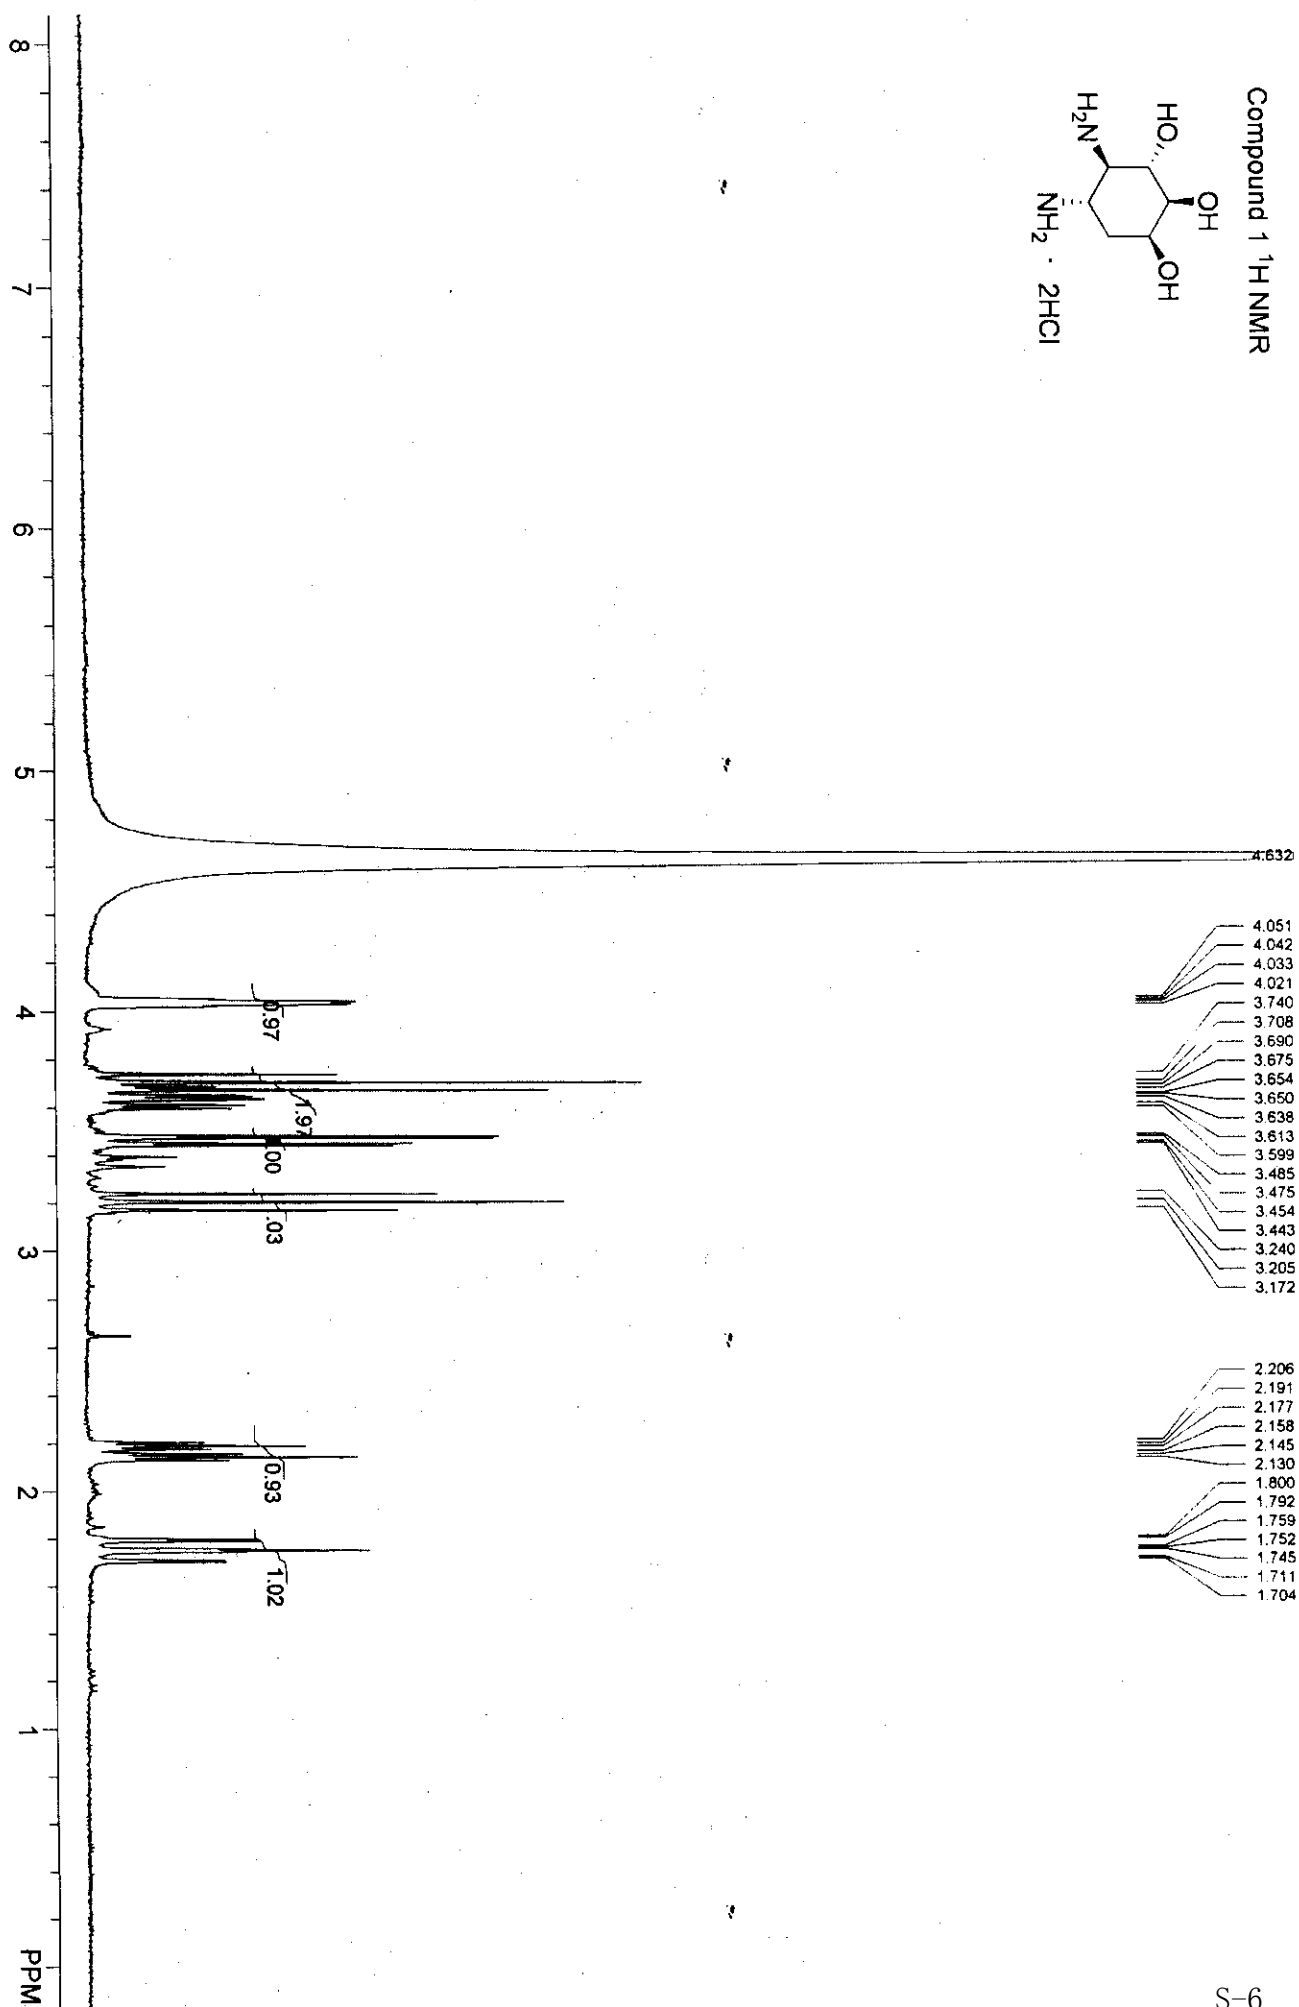

ppm

Compound 1  $^{13}\text{C}$  NMR

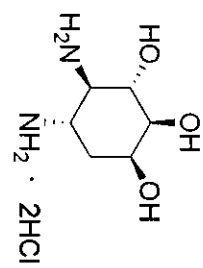

75.6167  
71.5617  
69.3729  
58.2980  
49.3190  
35.2990

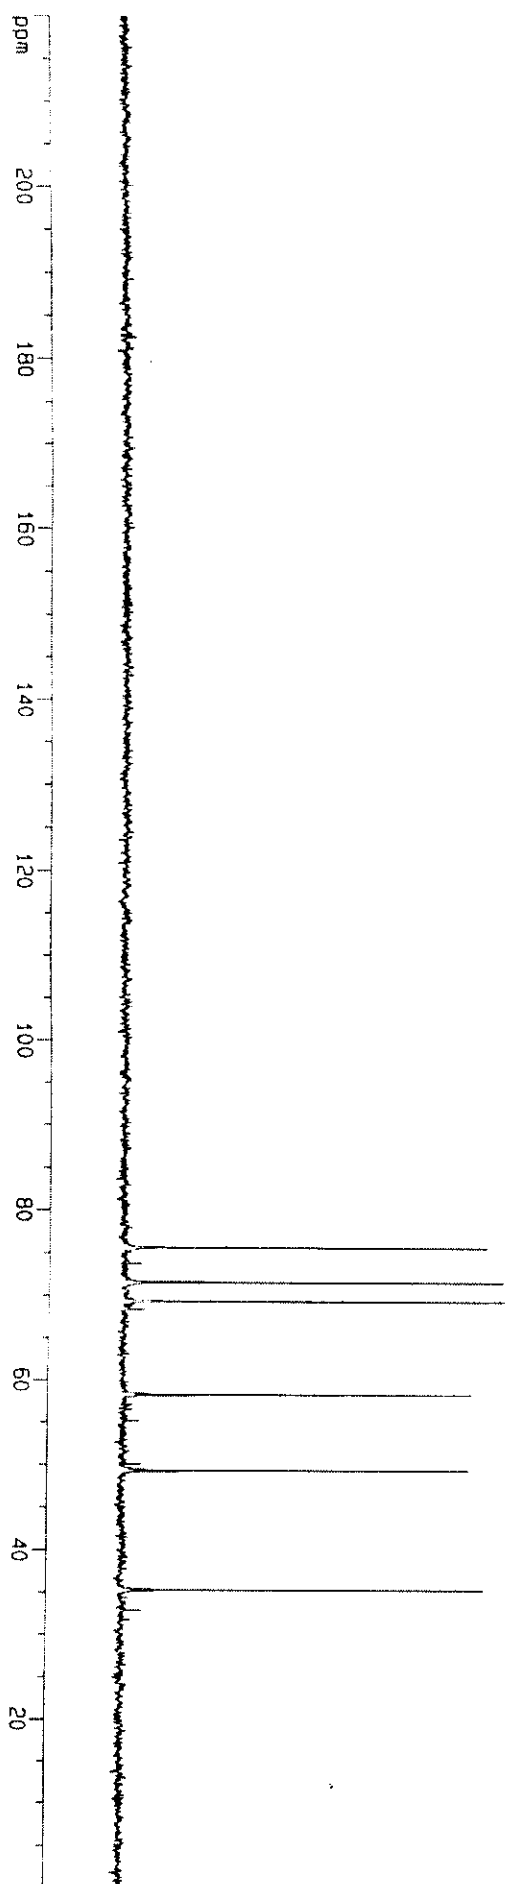

Compound 1 NOESY

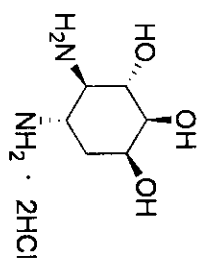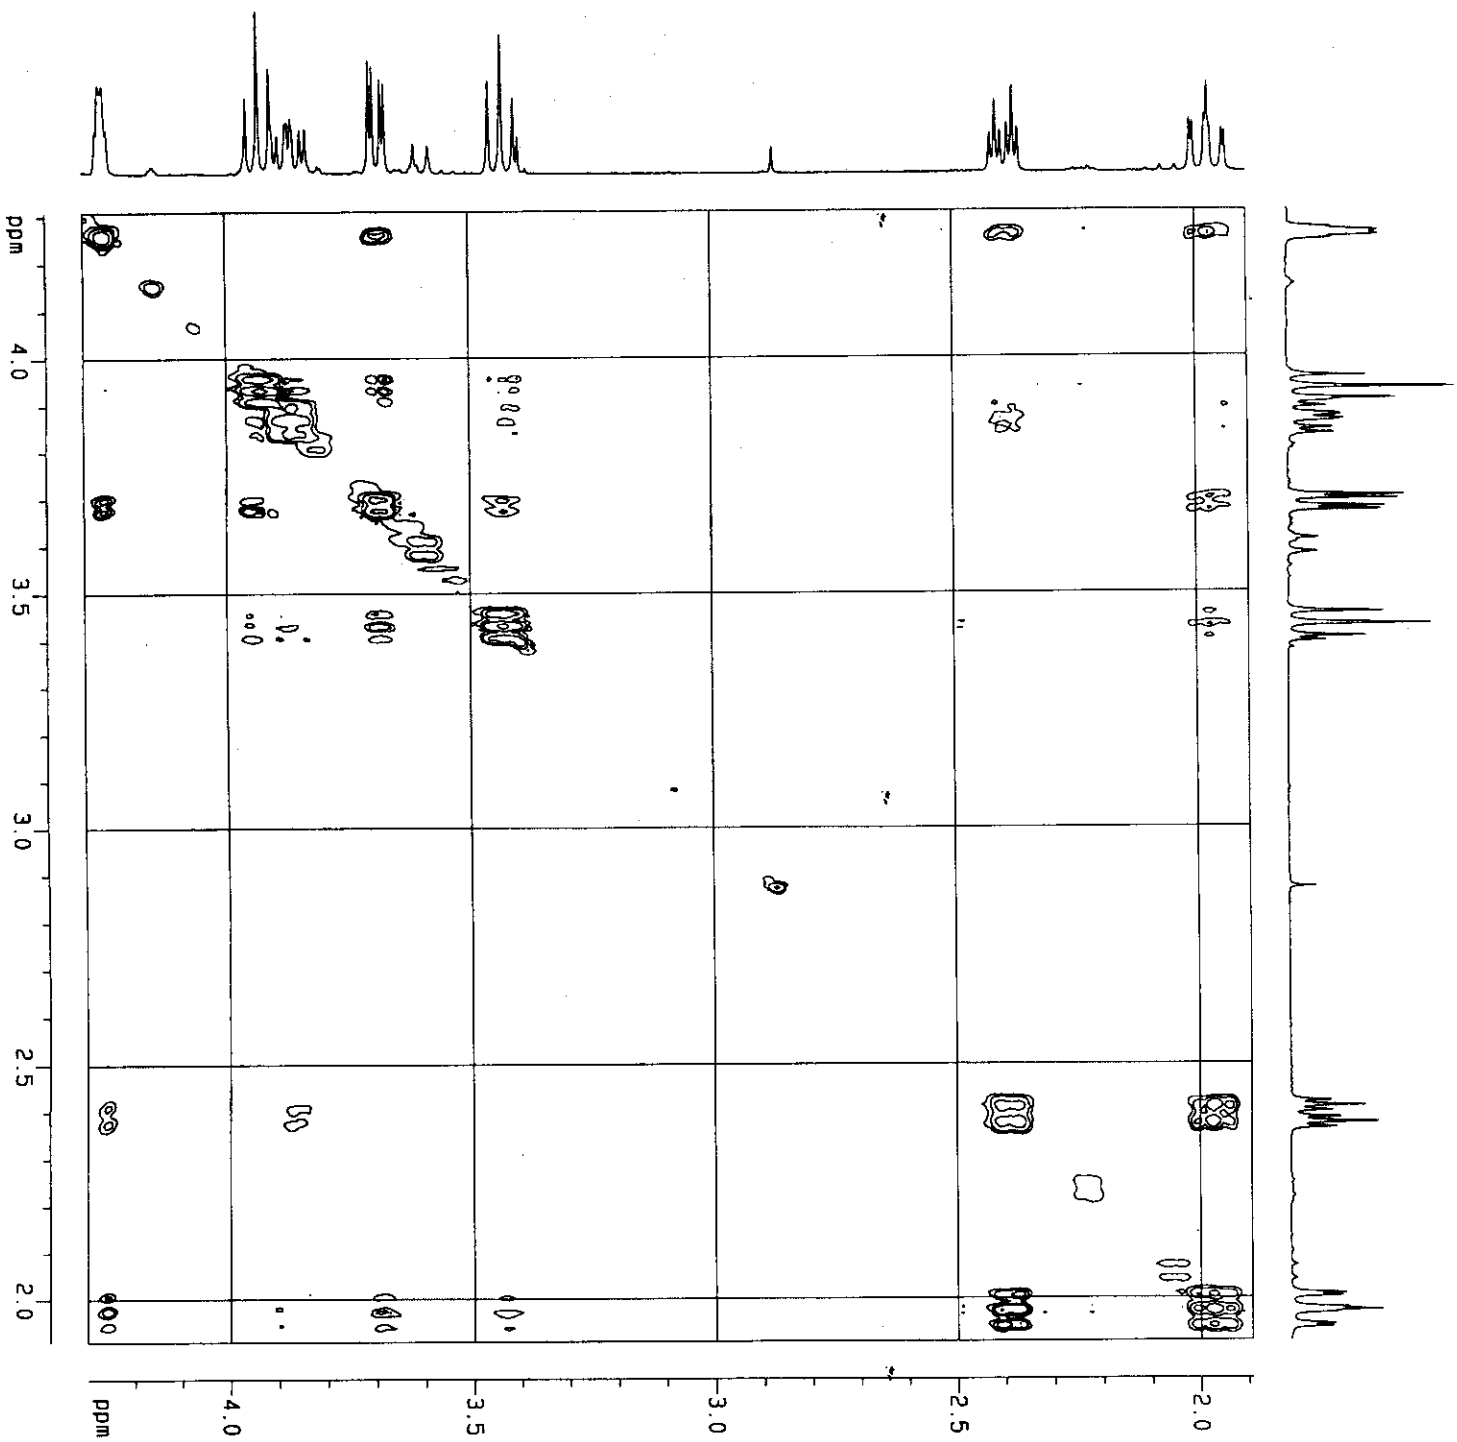

Compound 2  $^1\text{H}$  NMR

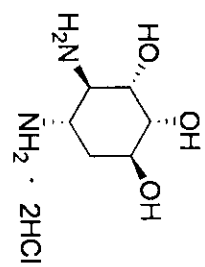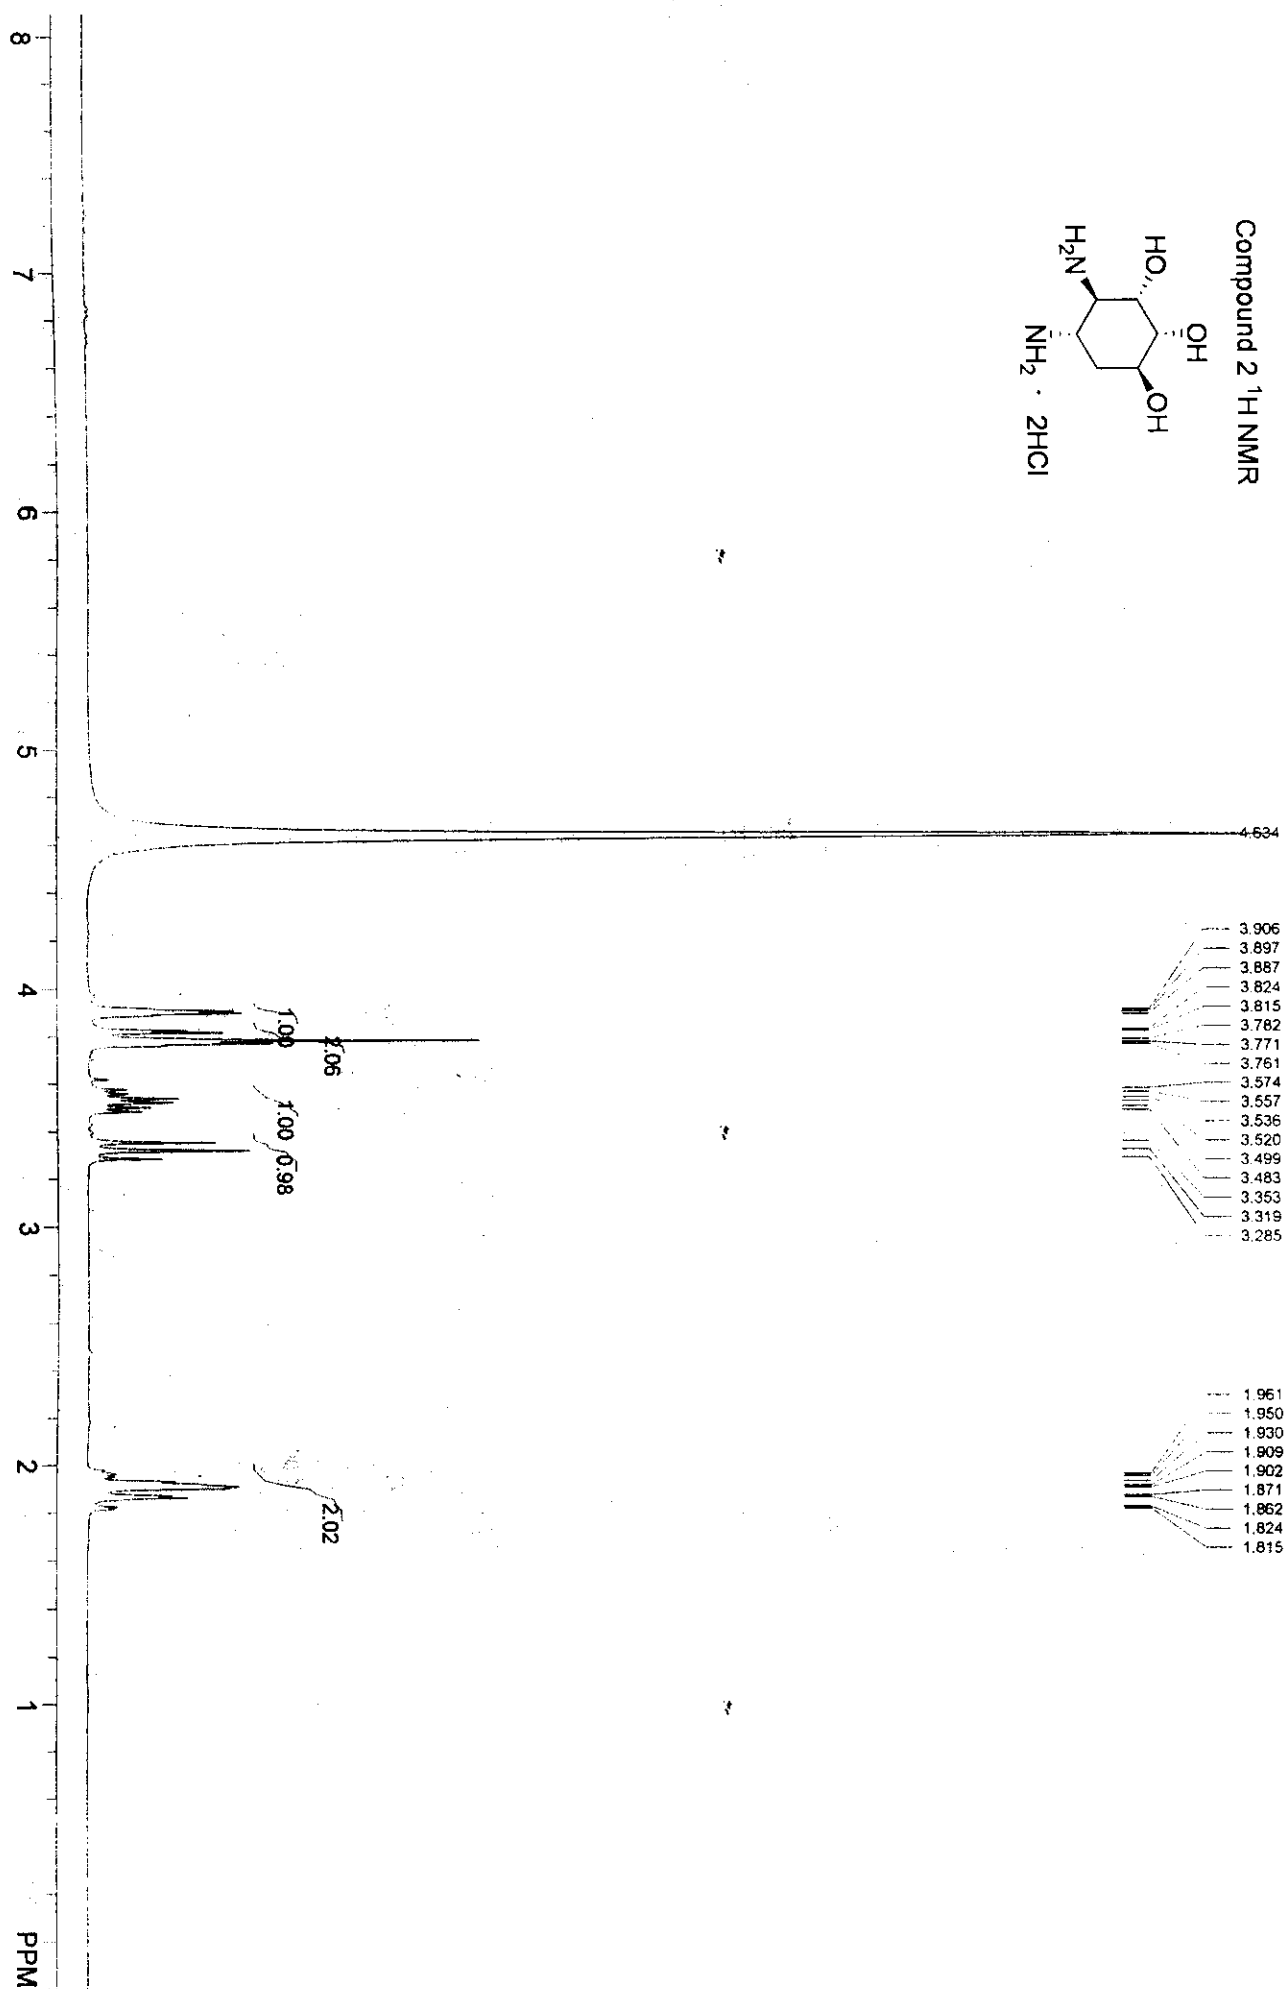

ppm

Compound 2  $^{13}\text{C}$  NMR

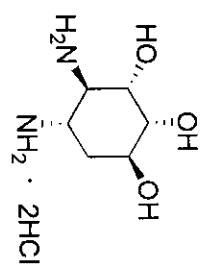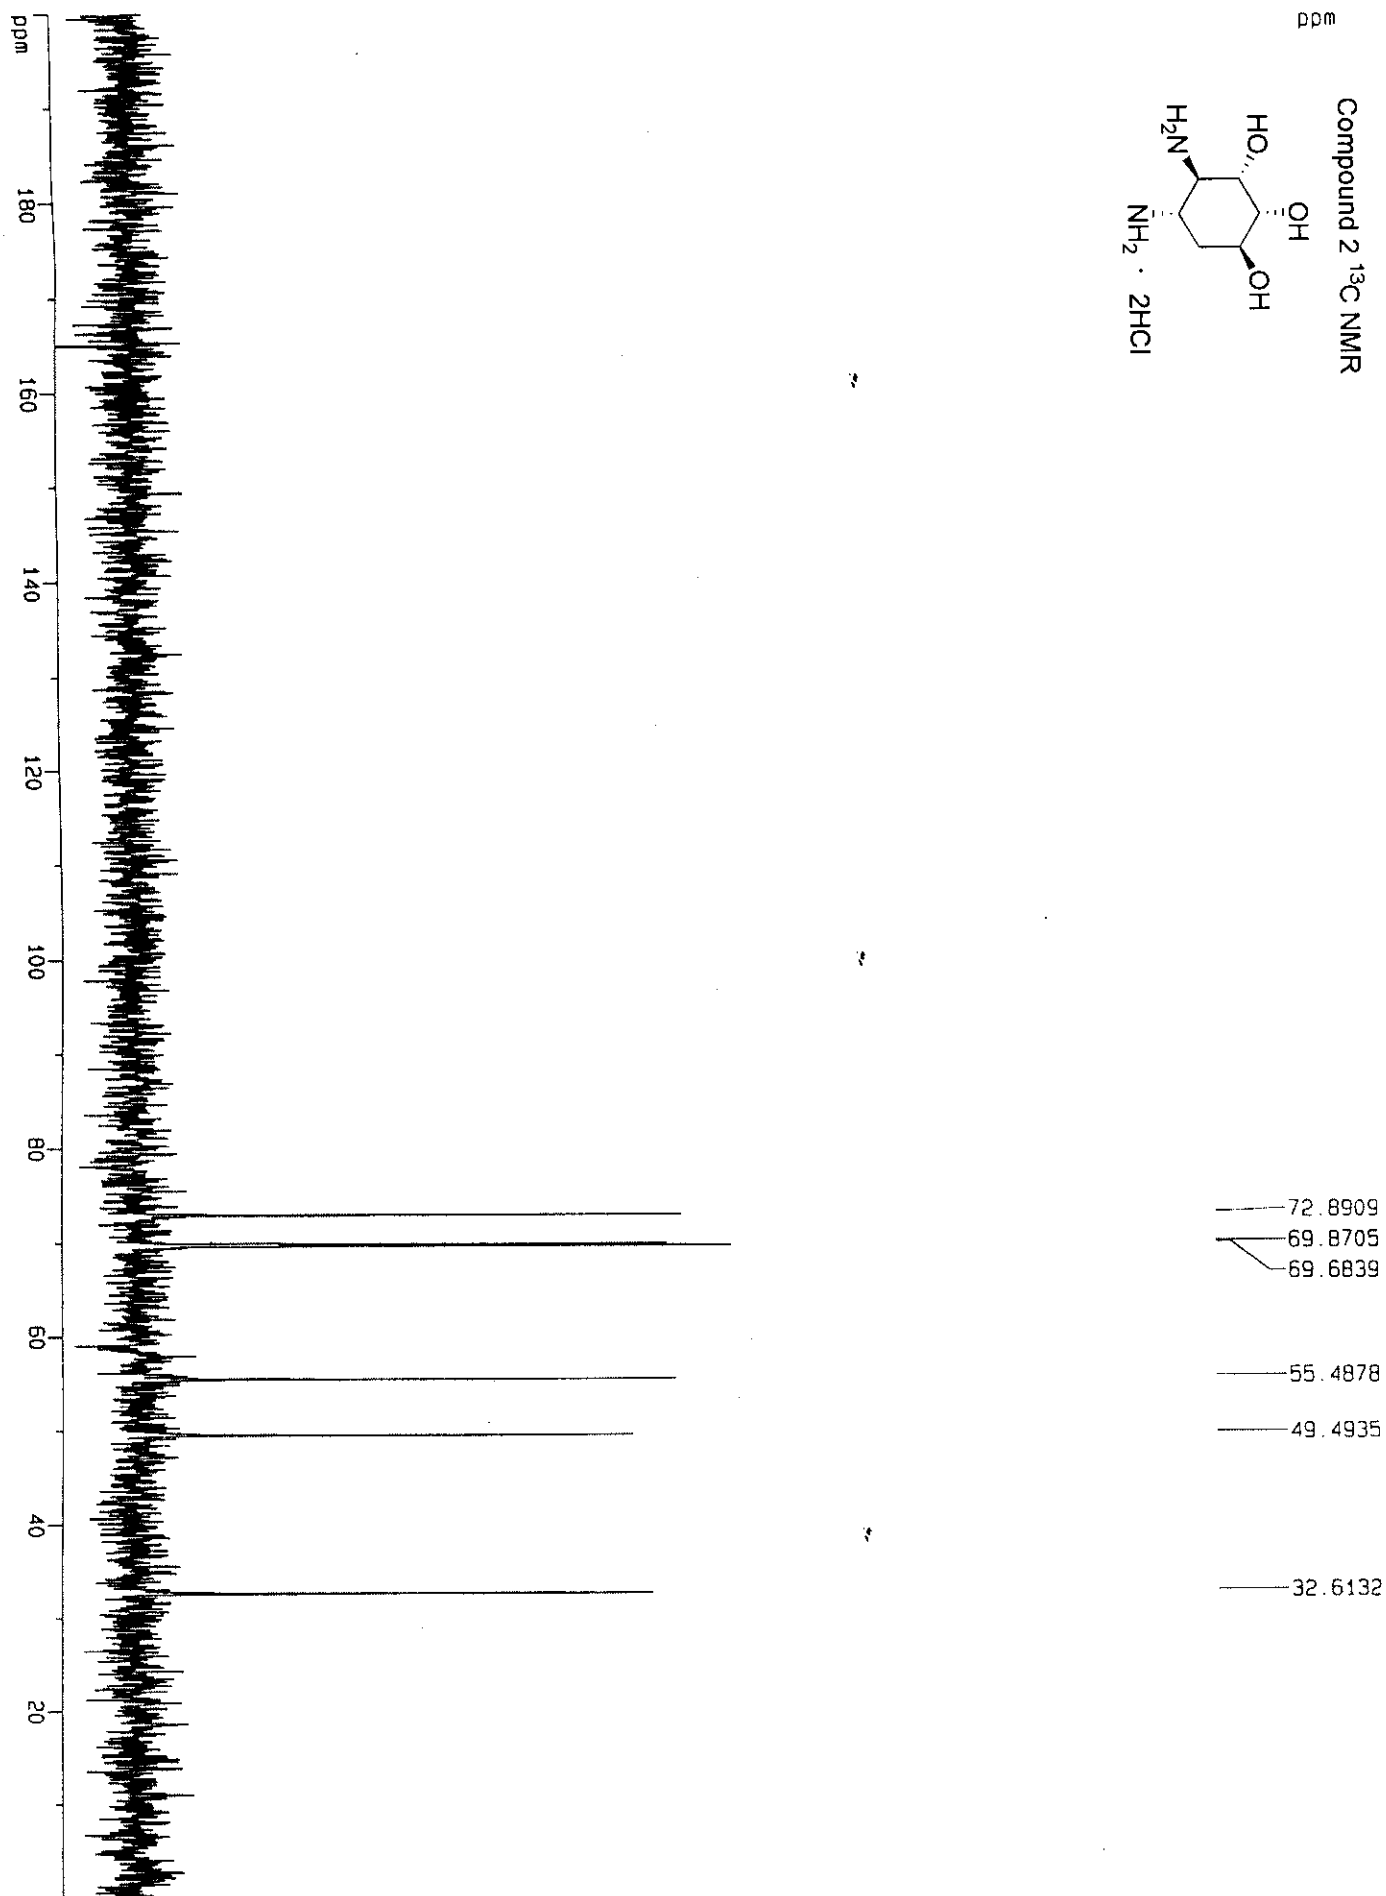

Compound 2 NOESY

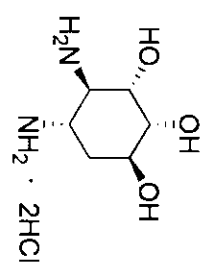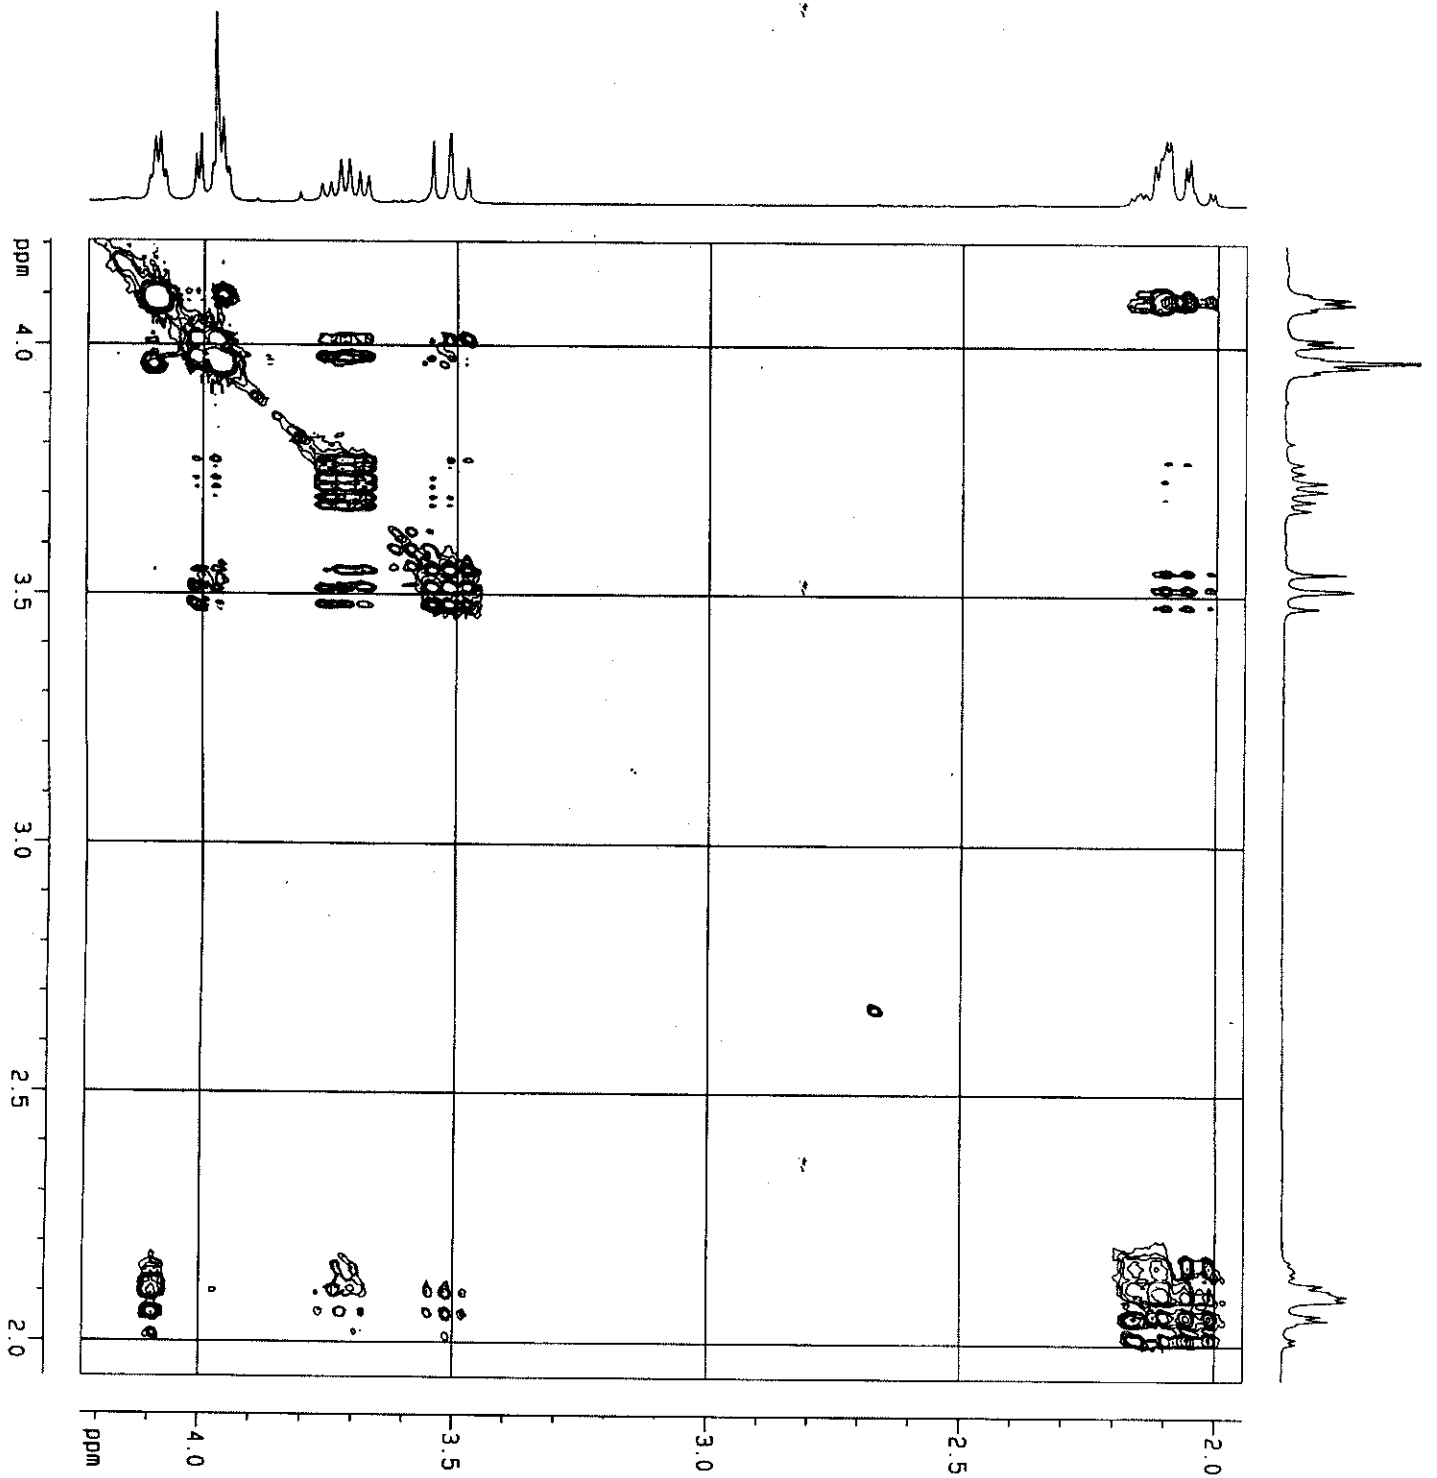

Hz

Compound 3  $^1\text{H}$  NMR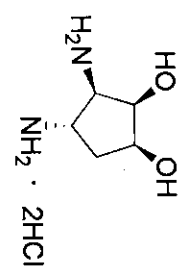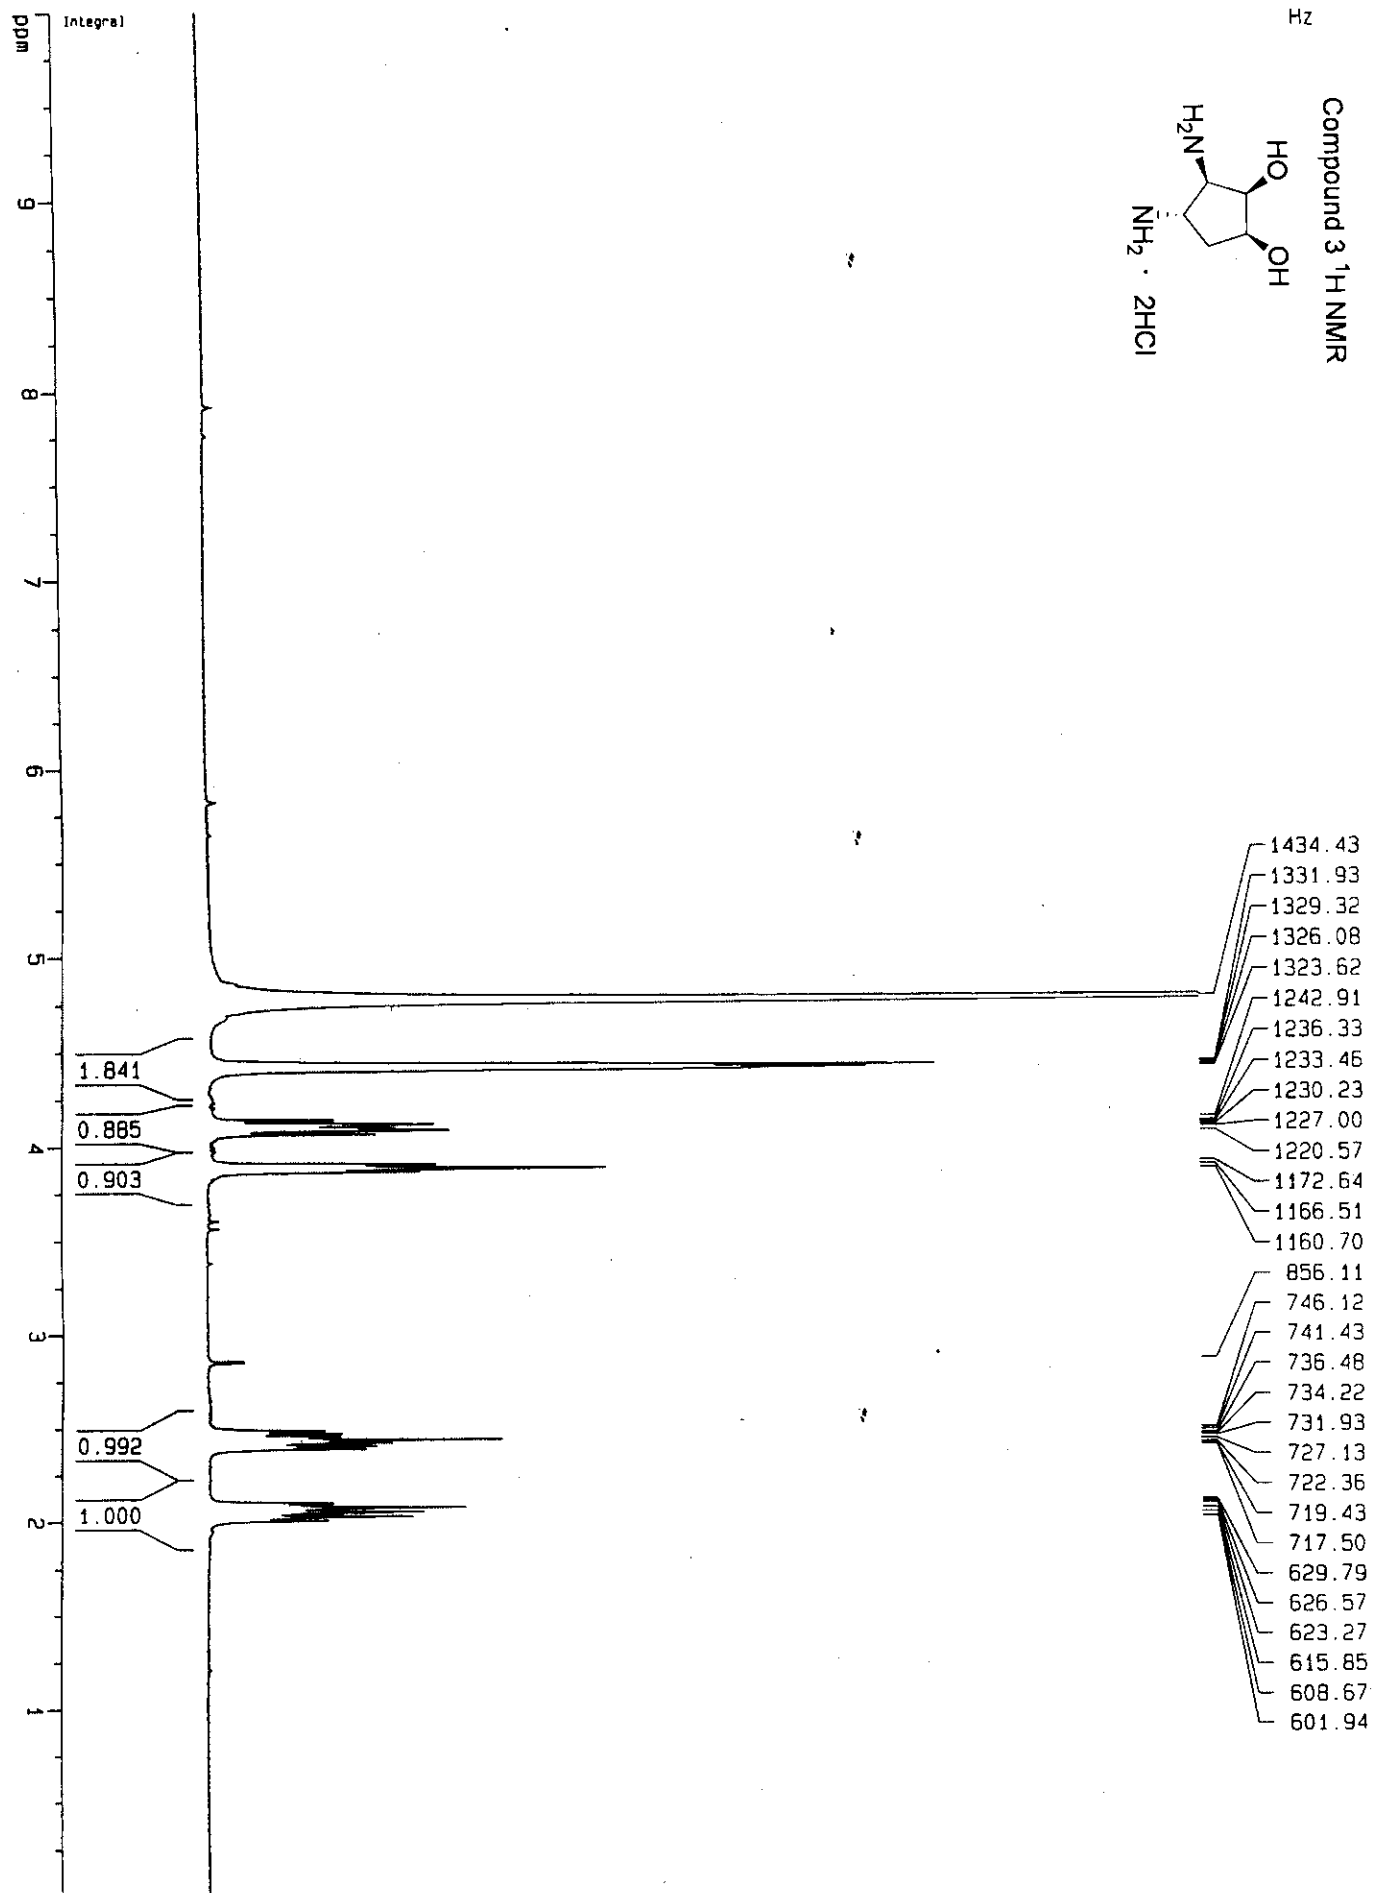

ppm

Compound 3  $^{13}\text{C}$  NMR

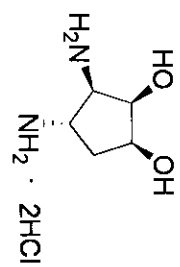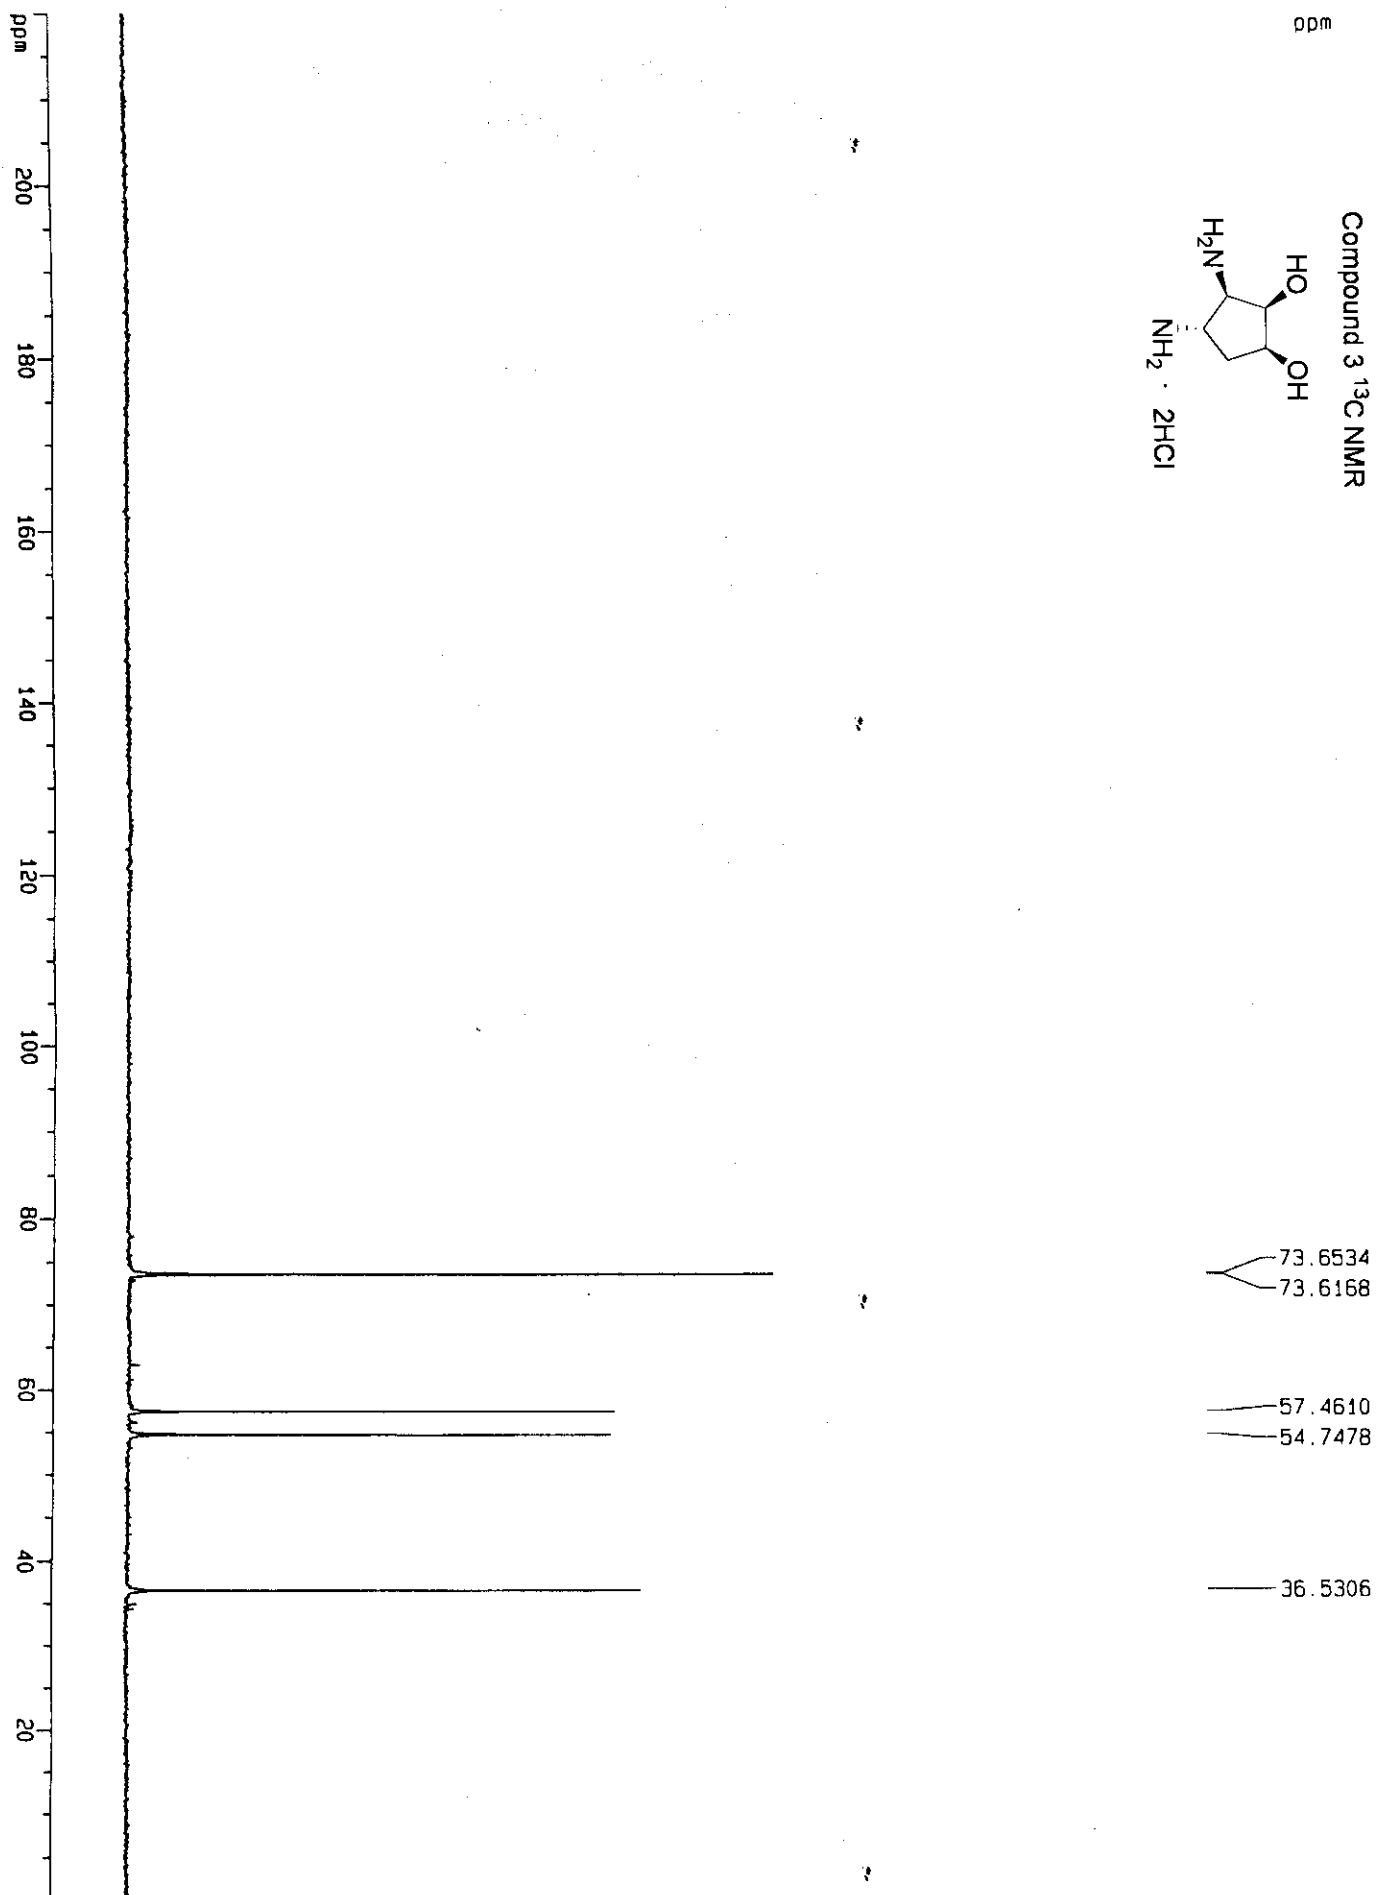

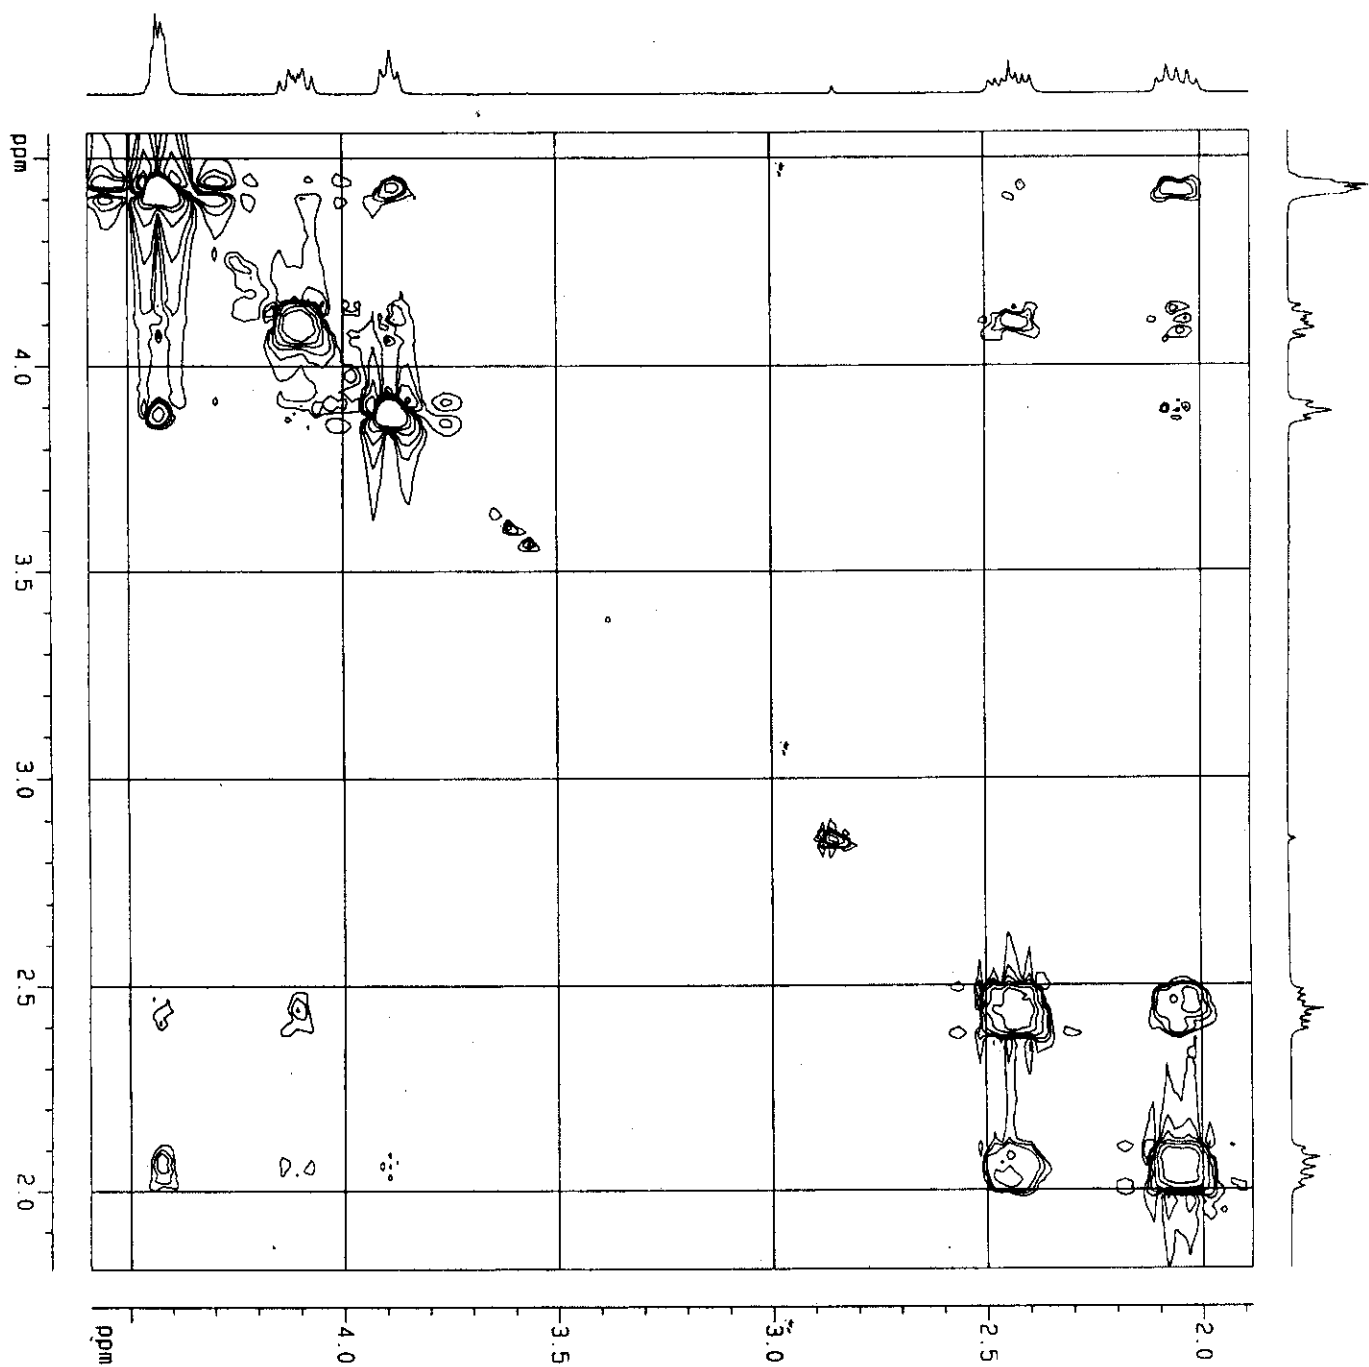

Compound 3 NOESY

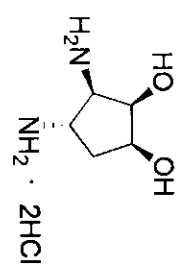

Compound 28 NOESY

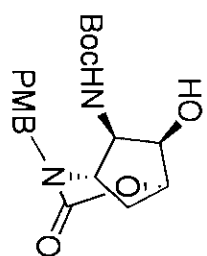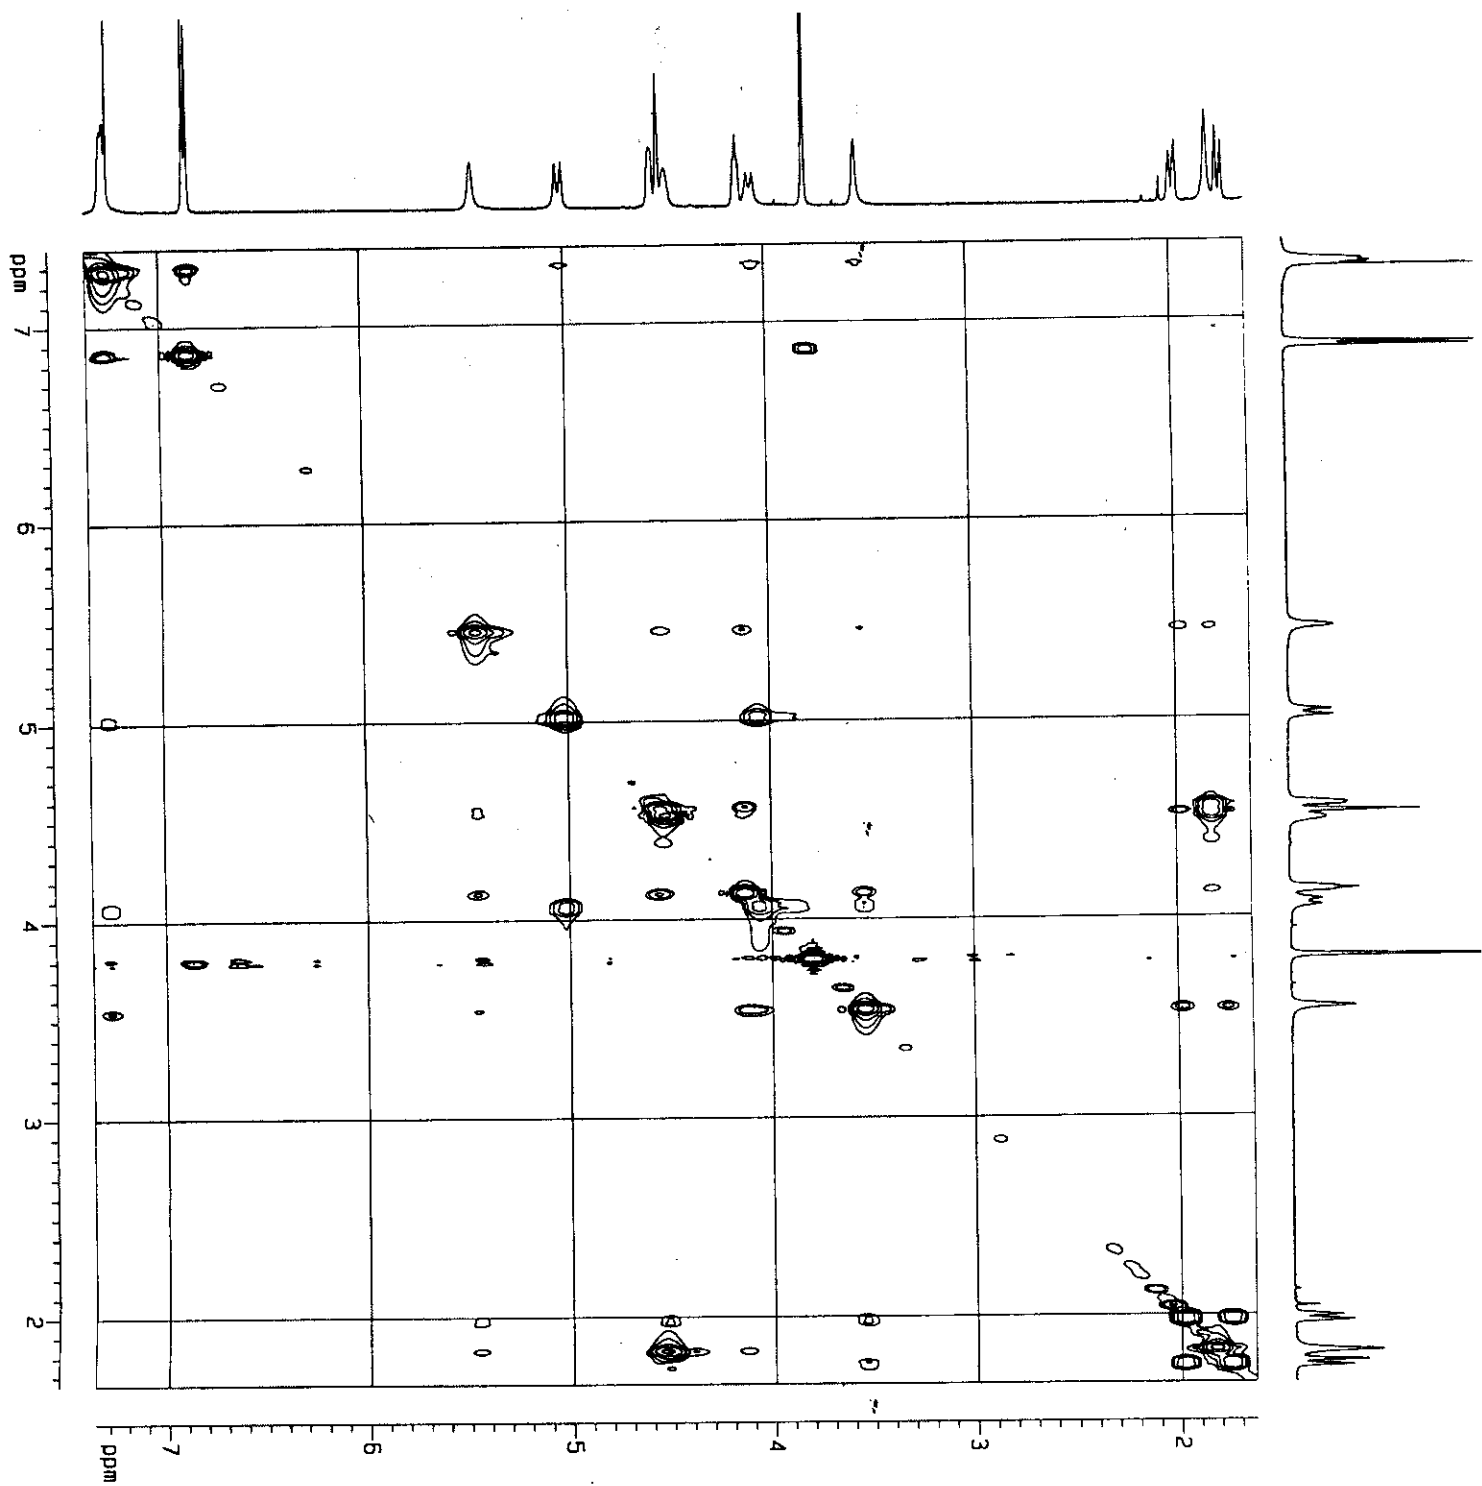

Compound 4  $^1\text{H}$  NMR

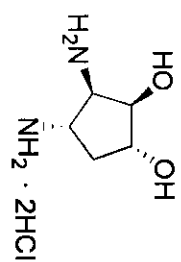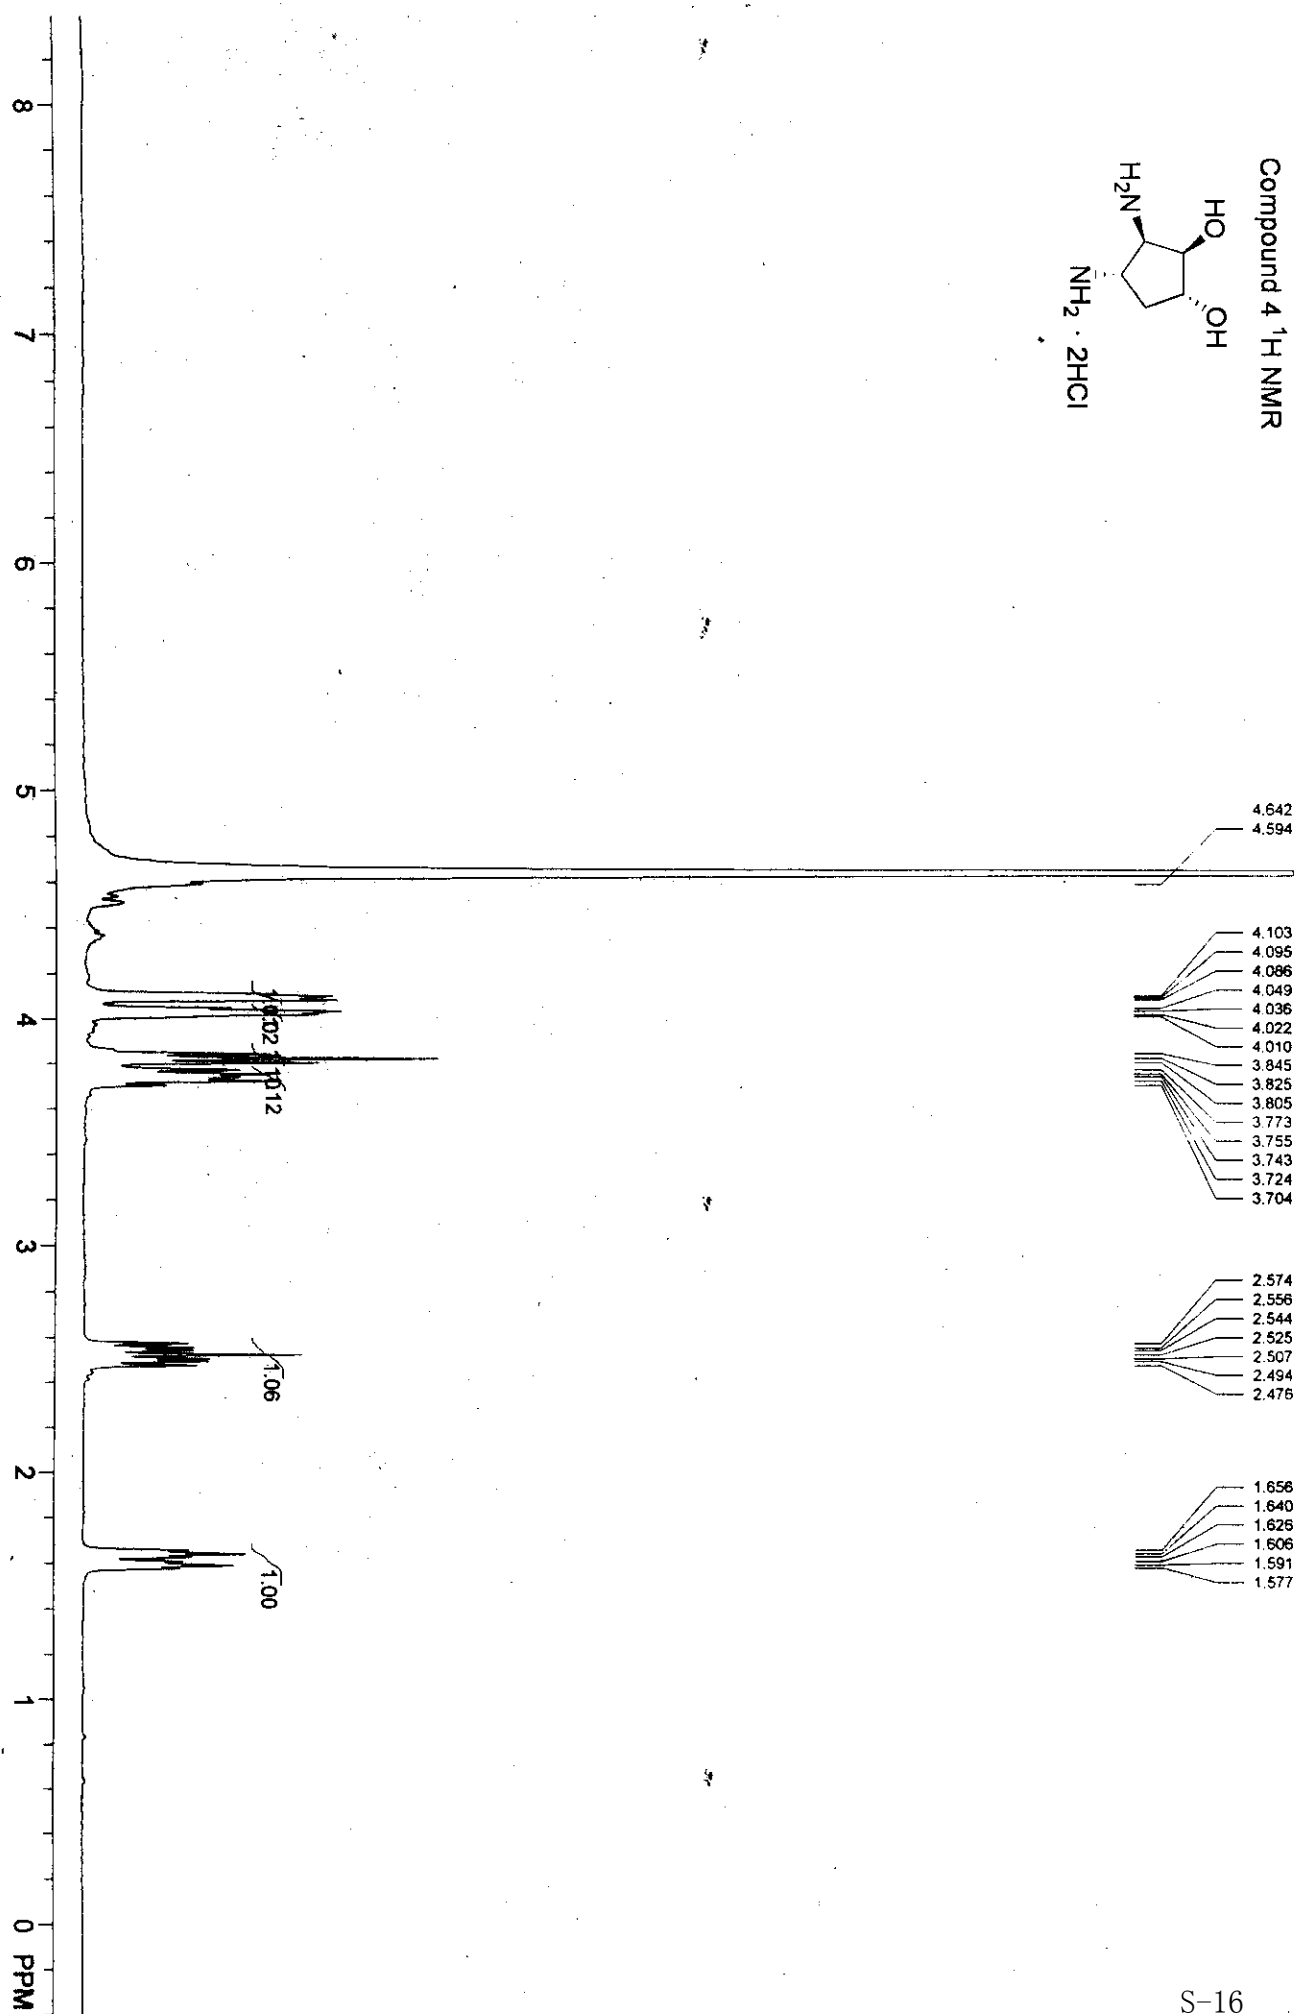

ppm

Compound 4  $^{13}\text{C}$  NMR

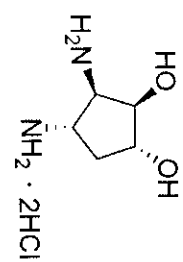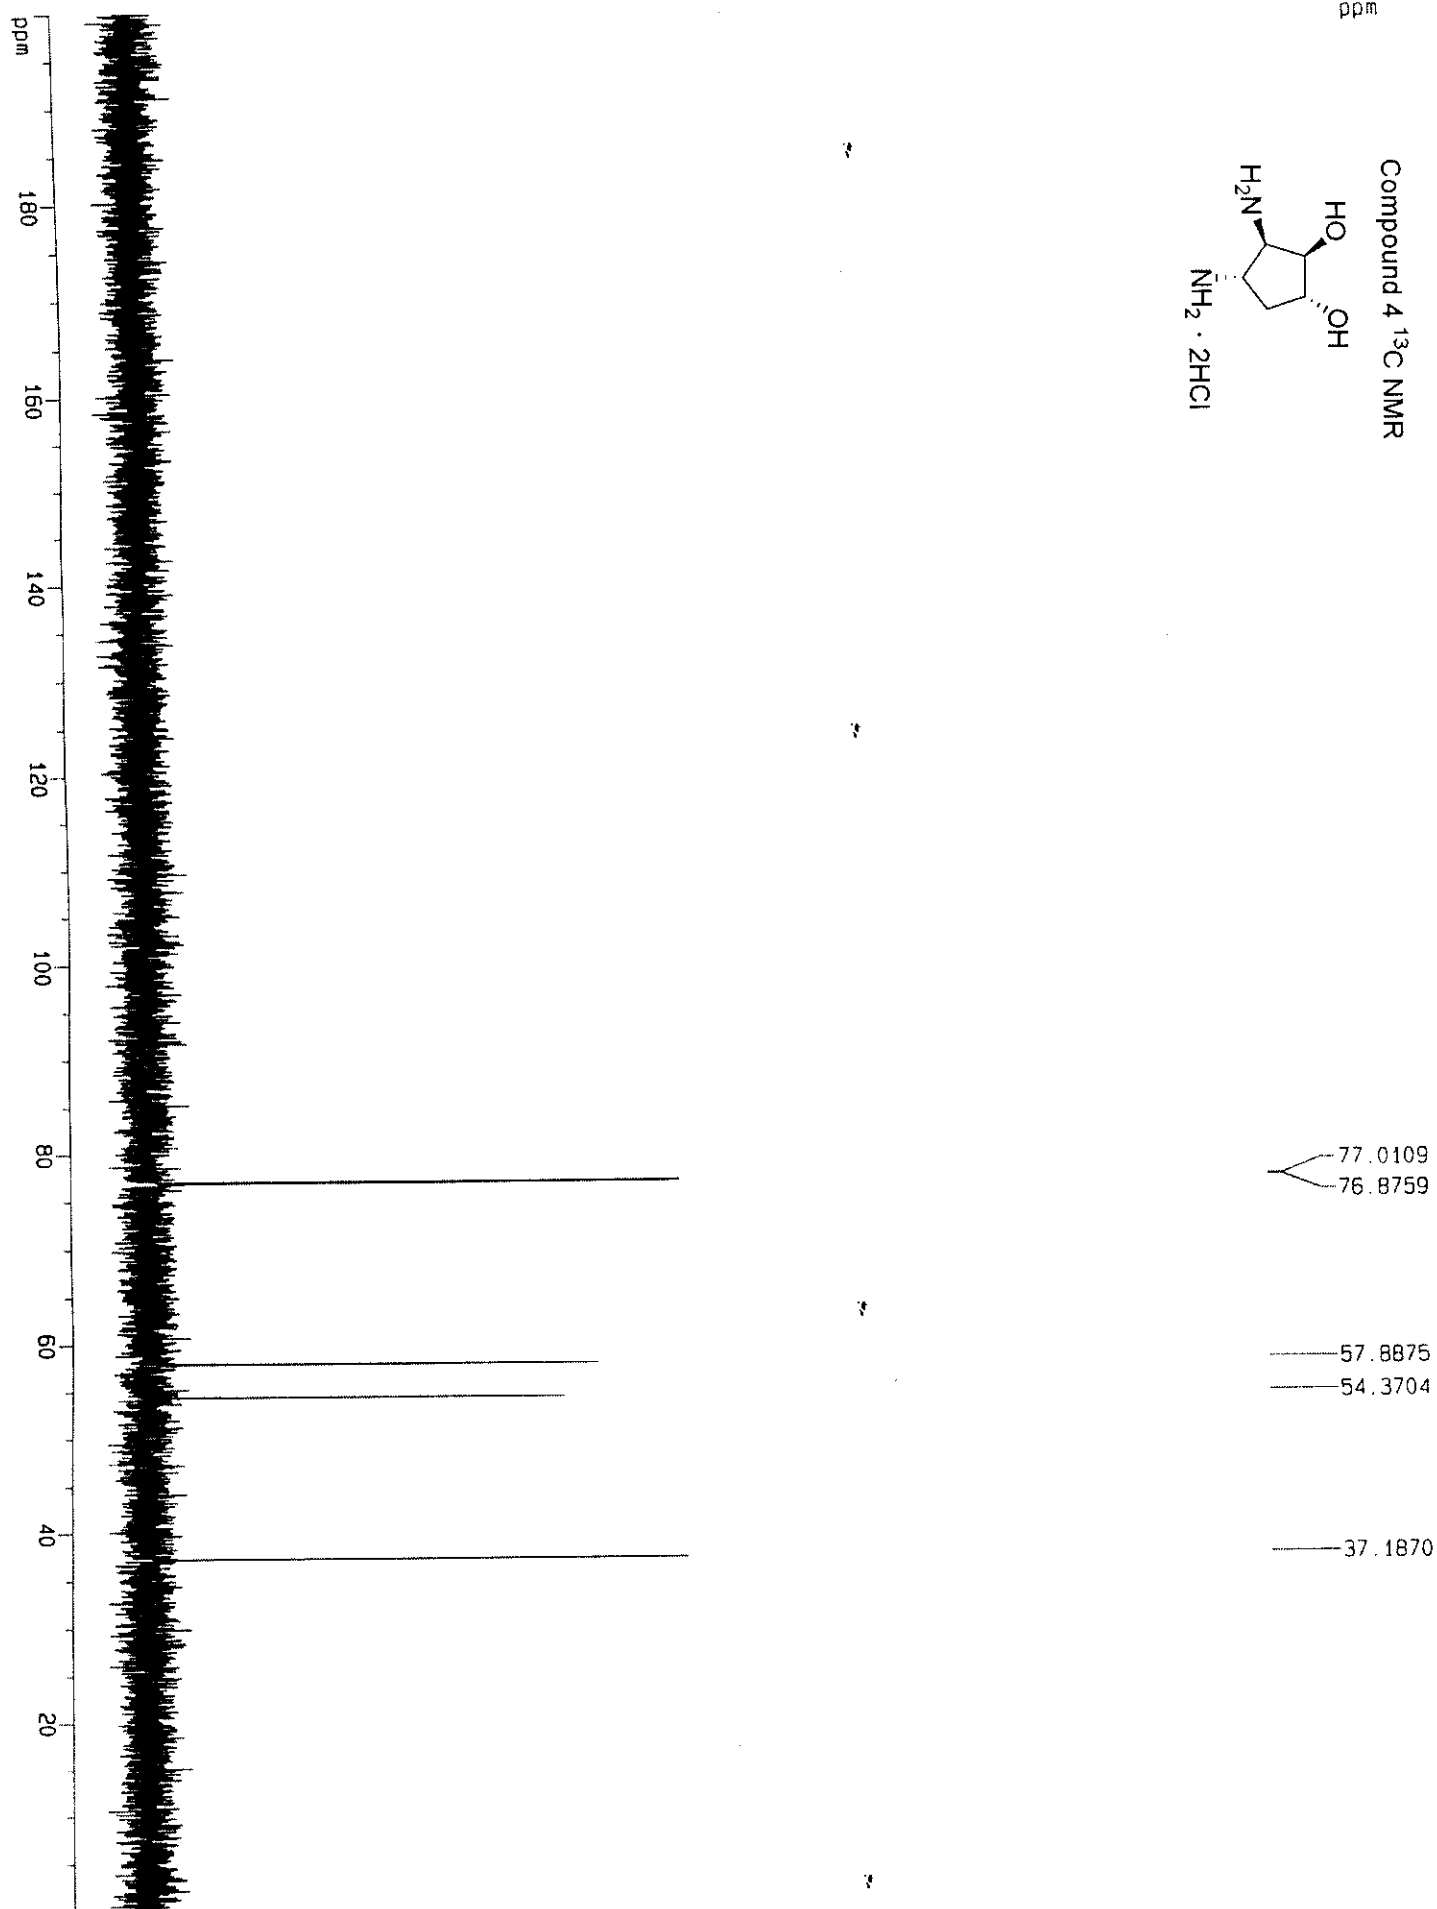

Supplement: Supplementary file 1 [file 5168914]
